# Supplementary material
Source: MDPI journal article supplement (https://www.mdpi.com/2079-9276/12/12/138)
Supplement: s1 [file s1]

Supplementary Material 1: Major ions chemistry and water molecule stable isotopes in groundwater and surface waters of the far north Cameroon.

*F = Borehole ; P = Hand-dug well ; R = River*

| GROUP A |            |             |             |       |     |                               |              |            |             |                                      |                        |                                     |                                      |                        |                       |                         |                         |                    |                     |       |                     |
|---------|------------|-------------|-------------|-------|-----|-------------------------------|--------------|------------|-------------|--------------------------------------|------------------------|-------------------------------------|--------------------------------------|------------------------|-----------------------|-------------------------|-------------------------|--------------------|---------------------|-------|---------------------|
|         | Aquifer    | X           | Y           | Z (m) | pH  | Electric Conductivity (µs/cm) | Salinity (%) | TDS (mg/l) | Temperature | HCO <sub>3</sub> <sup>-</sup> (mg/l) | Cl <sup>-</sup> (mg/l) | NO <sub>3</sub> <sup>-</sup> (mg/l) | SO <sub>4</sub> <sup>2-</sup> (mg/l) | Na <sup>+</sup> (mg/l) | K <sup>+</sup> (mg/l) | Mg <sup>2+</sup> (mg/l) | Ca <sup>2+</sup> (mg/l) | <sup>2</sup> H (‰) | <sup>18</sup> O (‰) | d (‰) | <sup>3</sup> H (TU) |
| F16     | Quaternary | 14°25'02.5" | 10°37'03.6" | 374,0 | 7,3 | 468,1                         | 0,8          | 234,8      | 31,6        | 244,0                                | 2,7                    | 0,0                                 | 2,3                                  | 30,3                   | 0,0                   | 14,1                    | 40,3                    | -10,6              | -2,3                | -2,3  | 3,6                 |
| F29     | Basement   | 14°06'37.3" | 10°32'54.4" | 478,0 | 6,6 | 3726,0                        | 6,1          | 1863,0     | 29,8        | 292,8                                | 371,3                  | 1118,8                              | 202,5                                | 221,3                  | 23,8                  | 128,5                   | 358,8                   | -12,4              | -2,4                | -2,4  |                     |
| P13     | Basement   | 14°06'38.7" | 10°32'56.1" | 475,0 | 6,8 | 1434,0                        | 2,4          | 710,0      | 28,3        | 158,4                                | 99,7                   | 353,7                               | 67,2                                 | 69,5                   | 7,9                   | 30,1                    | 149,6                   | -9,6               | -2,0                | -2,0  | 6,2                 |
| P4      | Quaternary | 14°32'32.8" | 10°35'19.3" | 357,0 | 7,3 | 805,4                         | 1,3          | 406,3      | 30,7        | 280,6                                | 3,7                    | 3,5                                 | 2,9                                  | 57,9                   | 1,0                   | 10,4                    | 30,6                    | -7,5               | -1,8                | -1,8  |                     |
| GROUP B |            |             |             |       |     |                               |              |            |             |                                      |                        |                                     |                                      |                        |                       |                         |                         |                    |                     |       |                     |
| F2      | Quaternary | 14°18'07.7" | 10°29'00.2" | 410,0 | 6,7 | 279,0                         | 0,5          | 146,9      |             | 146,4                                | 2,3                    | 0,0                                 | 0,9                                  | 26,2                   | 2,4                   | 6,3                     | 18,4                    | -17,7              | -3,2                | -10,3 | 3,7                 |
| F6      | Quaternary | 14°40'15.5" | 10°08'18.2" | 379,0 | 7,3 | 509,4                         | 0,9          | 258,2      | 30,8        | 274,5                                | 1,2                    | 0,0                                 | 0,0                                  | 41,2                   | 0,0                   | 11,6                    | 43,9                    | -21,3              | -3,5                | -3,5  | 2,9                 |
| F11     | Quaternary | 14°52'51.3" | 10°08'31.8  | 341,0 | 7,0 | 275,5                         | 0,5          | 138,1      | 31,4        | 152,3                                | 0,8                    | 0,0                                 | 0,0                                  | 10,5                   | 2,7                   | 5,9                     | 32,4                    | -29,1              | -4,2                | -4,2  | 2,7                 |
| F13     | Quaternary | 15°13'46.9" | 10°20'12.1" | 335,0 | 7,0 | 324,3                         | 0,5          | 164,0      | 31,7        | 146,4                                | 14,1                   | 0,0                                 | 2,0                                  | 14,5                   | 8,6                   | 7,4                     | 26,8                    | -23,6              | -3,1                | -3,1  |                     |
| F14     | Quaternary | 15°17'32.2" | 10°18'50.7" | 324,0 | 6,9 | 206,3                         | 0,3          | 103,0      | 30,3        | 109,8                                | 1,1                    | 0,0                                 | 0,8                                  | 10,5                   | 3,8                   | 3,7                     | 21,9                    | -23,5              | -3,7                | -3,7  | 2,3                 |
| F16     | Quaternary | 14°25'02.5" | 10°37'03.6" | 374,0 | 7,3 | 468,1                         | 0,8          | 234,8      | 31,6        | 244,0                                | 2,7                    | 0,0                                 | 2,3                                  | 30,3                   | 0,0                   | 14,1                    | 40,3                    | -10,6              | -2,3                | -2,3  | 3,6                 |
| F20     | Quaternary | 14°51'16.4" | 10°24'35.3" | 335,0 | 7,4 | 266,6                         | 0,4          | 133,6      | 31,1        | 146,4                                | 0,0                    | 0,0                                 | 3,5                                  | 22,6                   | 4,1                   | 2,6                     | 27,3                    | -33,7              | -4,7                | -4,7  |                     |
| F24     | Quaternary | 14°28'37.5  | 10°41'46.5" | 358,0 | 6,5 | 192,1                         | 0,3          | 94,7       | 31,6        | 97,6                                 | 2,8                    | 0,0                                 | 2,2                                  | 12,1                   | 3,2                   | 4,2                     | 15,5                    | -14,8              | -2,9                | -2,9  | 4,4                 |
| F25     | Quaternary | 14°28'07"   | 10°41'46.3" | 358,0 | 6,8 | 149,7                         | 0,2          | 74,4       | 30,8        | 91,5                                 | 1,7                    | 0,0                                 | 1,3                                  | 14,3                   | 2,9                   | 2,7                     | 12,1                    | -29,6              | -4,4                | -4,4  |                     |
| F32     | Quaternary | 14°15'50.9" | 10°31'21.8" | 418,0 | 6,8 | 336,6                         | 0,7          | 165,8      | 29,8        | 189,1                                | 3,3                    | 0,0                                 | 3,7                                  | 37,9                   | 1,2                   | 6,4                     | 23,0                    | -21,4              | -3,7                | -3,7  |                     |
| P6      | Quaternary | 14°46'27.2" | 10°37'38.1" | 328,0 | 7,0 | 604,0                         | 1,0          | 294,5      | 27,8        | 197,3                                | 4,2                    | 0,0                                 | 2,4                                  | 17,6                   | 4,3                   | 5,1                     | 48,3                    | -36,4              | -5,5                | -5,5  | 2,8                 |
| P7      | Quaternary | 14°43'42.1" | 10°48'28.0" | 323,0 | 6,8 | 248,6                         | 0,4          | 124,7      | 31,4        | 128,1                                | 0,4                    | 0,0                                 | 0,7                                  | 12,8                   | 1,9                   | 3,3                     | 28,8                    | -27,3              | -4,1                | -4,1  | 5,0                 |
| P9      | Basement   | 13°50'08"   | 10°42'17.1" | 804,0 | 7,1 | 301,2                         | 0,5          | 148,9      | 26,4        | 128,1                                | 9,0                    | 0,0                                 | 13,5                                 | 14,2                   | 10,9                  | 3,3                     | 32,6                    | -28,2              | -4,3                | -4,3  |                     |
| P12     | Basement   | 14°02'35.8" | 10°34'31.5" | 505,0 | 6,7 | 176,2                         | 0,3          | 87,9       | 30,7        | 97,6                                 | 1,0                    | 0,0                                 | 0,5                                  | 19,3                   | 0,5                   | 2,1                     | 14,0                    | -22,4              | -3,8                | -3,8  |                     |
| R2      | Quaternary | 14°17'58.3" | 10°28'43.8" | 409,0 | 7,6 | 221,6                         | 0,4          | 110,3      | 30,2        | 115,9                                | 3,3                    | 0,0                                 | 2,6                                  | 9,2                    | 5,1                   | 3,5                     | 24,2                    | -13,9              | -1,2                | -1,2  |                     |
| R4      | Quaternary | 14°26'55.5" | 10°37'05.8" | 373,0 | 8,5 | 193,5                         | 0,3          | 98,3       | 28,4        | 97,6                                 | 5,3                    | 0,0                                 | 4,2                                  | 14,9                   | 4,0                   | 3,2                     | 19,0                    | -12,7              | -1,3                | -1,3  |                     |
| R5      | Quaternary | 14°46'01.8" | 10°37'50.6" | 326,0 | 7,6 | 247,9                         | 0,4          | 127,0      | 26,4        | 140,3                                | 1,7                    | 0,0                                 | 1,2                                  | 10,3                   | 4,6                   | 5,0                     | 27,5                    | -14,6              | -1,6                | -1,6  | 5,1                 |
| F11     | Quaternary | 15°17'41.8" | 10°18'51.8" | 324,0 | 7,3 | 71,5                          | 0,1          | 35,4       | 31,1        | 46,6                                 | 1,0                    | 0,0                                 | 0,0                                  | 4,6                    | 3,8                   | 2,4                     | 5,6                     | -23,6              | -3,8                | -3,8  | 3,6                 |

|     |            |             |             |             |       |        |       |       |       |       |       |       |       |       |      |      |      |       |       |      |     |
|-----|------------|-------------|-------------|-------------|-------|--------|-------|-------|-------|-------|-------|-------|-------|-------|------|------|------|-------|-------|------|-----|
| R3  | Quaternary | 14°32'21.5" | 10°09'57.4" | 379,0       | 7,3   | 152,9  | 0,3   | 77,3  | 30,3  | 91,5  | 5,8   | 0,4   | 1,5   | 11,5  | 7,4  | 2,2  | 14,1 | -20,9 | -2,7  | -2,7 | 6,1 |
| P11 | Basement   | 14°00'25.5" | 10°35'14.5" | 10°35'14.5" | 530,0 | 7,0    | 303,9 | 0,5   | 155,0 | 26,9  | 158,4 | 4,9   | 0,9   | 5,0   | 17,8 | 21,8 | 4,3  | 241,9 | -33,9 | -5,4 | 4,9 |
| F21 | Quaternary | 14°46'34.4" | 10°37'33.0" | 325,0       | 6,7   | 307,7  | 0,5   | 152,9 | 29,2  | 158,4 | 0,7   | 1,2   | 1,0   | 11,0  | 1,8  | 3,7  | 39,8 | -33,1 | -5,2  | -5,2 | 2,3 |
| F28 | Basement   | 13°58'37.9" | 10°34'00.4" | 566,0       | 6,9   | 342,4  | 0,6   | 171,4 | 30,2  | 183,0 | 4,3   | 1,3   | 1,2   | 46,2  | 2,1  | 2,9  | 21,0 | -22,3 | -3,7  | -3,7 | 3,4 |
| F41 | Basement   | 14°13'38.0" | 10°51'42.1" | 401,0       | 6,8   | 163,4  | 0,3   | 82,2  | 30,5  | 97,6  | 3,5   | 2,6   | 3,4   | 18,6  | 0,9  | 3,2  | 12,9 | -19,9 | -3,5  | -3,5 | 3,1 |
| F23 | Quaternary | 14°43'39.6" | 10°48'31.7" | 327,0       | 6,9   | 517,1  | 0,9   | 261,1 | 31,2  | 207,4 | 1,0   | 2,9   | 3,2   | 32,0  | 11,1 | 8,9  | 25,5 | -28,6 | -4,2  | -4,2 |     |
| F3  | Basement   | 14°17'58.3" | 10°24'15.8" | 418,0       | 7,2   | 215,0  | 0,4   | 107,3 | 31,6  | 97,6  | 3,0   | 4,1   | 5,0   | 9,4   | 10,3 | 3,9  | 18,9 | -18,2 | -3,1  | -3,1 |     |
| F45 | Basement   | 14°09'30.3" | 11°02'10.2" | 424,0       | 7,4   | 590,6  | 1,0   | 294,8 | 32,4  | 280,6 | 4,8   | 4,3   | 6,1   | 51,1  | 4,1  | 10,8 | 40,2 | -25,8 | -3,9  | -3,9 |     |
| F15 | Quaternary | 14°25'16.1" | 10°37'24.5" | 373,0       | 7,3   | 243,4  | 0,4   | 121,2 | 32,3  | 115,9 | 1,6   | 5,2   | 5,0   | 19,7  | 2,5  | 5,4  | 16,3 | -23,3 | -4,0  | -4,0 | 1,2 |
| F43 | basement   | 14°12'13.3" | 10°57'37.9" | 421,0       | 7,0   | 243,7  | 0,4   | 122,1 | 30,5  | 122,0 | 3,2   | 5,5   | 2,9   | 23,5  | 1,0  | 4,3  | 18,0 | -27,7 | -4,4  | -4,4 | 4,2 |
| F10 | Quaternary | 14°49'24.4" | 10°09'24,3" | 346,0       | 7,2   | 384,3  | 0,6   | 192,0 | 31,0  | 183,0 | 0,6   | 8,3   | 0,0   | 9,1   | 2,1  | 7,5  | 43,2 | -28,4 | -4,6  | -4,6 | 1,6 |
| F26 | Basement   | 13°50'25.6" | 10°42'12.9" | 776,0       | 7,0   | 540,4  | 0,9   | 267,8 | 28,8  | 262,6 | 13,0  | 10,5  | 6,0   | 41,6  | 3,3  | 11,2 | 50,8 | -20,8 | -3,5  | -3,5 |     |
| F4  | Basement   | 14°27'31.4" | 10°19'53.5" | 392,0       | 6,4   | 214,5  | 0,4   | 108,5 | 31,0  | 97,6  | 3,3   | 12,8  | 5,4   | 10,6  | 3,3  | 6,1  | 21,5 | -21,2 | -3,8  | -3,8 | 4,1 |
| R1  | Quaternary | 14°17'59"   | 10°35'51.3" | 402,0       | 6,8   | 291,9  | 0,4   | 144,3 | 25,2  | 122,0 | 11,4  | 14,8  | 11,6  | 18,8  | 5,7  | 4,1  | 28,9 | -17,0 | -2,6  | -2,6 |     |
| F38 | Quaternary | 14°17'36.5" | 10°39'23.1" | 610,0       | 6,8   | 1056,0 | 1,7   | 520,0 | 29,9  | 378,2 | 4,4   | 23,7  | 111,0 | 86,3  | 3,0  | 32,7 | 54,4 | -24,7 | -4,0  | -4,0 | 4,4 |
| P5  | Quaternary | 14°40'14.1" | 10°30'49.5" | 186,0       | 7,0   | 403,6  | 0,7   | 203,2 | 32,3  | 164,3 | 3,6   | 26,9  | 3,9   | 22,9  | 1,9  | 4,6  | 43,3 | -25,1 | -3,6  | -3,6 | 3,4 |
| F33 | Quaternary | 14°14'25.4" | 10°27'03.5" | 427,0       | 6,5   | 282,7  | 0,5   | 141,6 | 29,6  | 115,9 | 5,9   | 30,7  | 8,0   | 15,7  | 1,3  | 6,1  | 27,4 | -22,8 | -3,9  | -3,9 | 3,0 |
| P10 | Basement   | 13°53'50"   | 10°37'59.2" | 612,0       | 7,2   | 681,9  | 1,1   | 343,0 | 29,7  | 292,8 | 27,5  | 30,7  | 10,8  | 48,4  | 4,1  | 16,1 | 65,4 | -21,4 | -3,3  | -3,3 |     |
| F5  | Basement   | 14°29'57.7" | 10°12'27"   | 414,0       | 7,1   | 349,8  | 0,6   | 181,5 | 31,1  | 146,4 | 7,7   | 34,7  | 5,6   | 23,8  | 1,6  | 6,8  | 32,6 | -25,7 | -4,2  | -4,2 | 3,2 |
| F22 | Quaternary | 14°36'41.8" | 10°43'24.2" | 344,0       | 6,7   | 266,4  | 0,4   | 133,5 | 30,8  | 73,2  | 5,1   | 40,5  | 4,5   | 19,2  | 3,7  | 3,5  | 19,4 | -26,5 | -4,3  | -4,3 | 2,3 |
| F44 | Basement   | 14°11'31.4" | 10°59'23.5" | 416,0       | 6,9   | 568,5  | 0,9   | 282,3 | 30,6  | 189,1 | 17,9  | 47,4  | 13,2  | 40,7  | 5,5  | 11,6 | 42,3 | -27,5 | -4,7  | -4,7 | 3,6 |
| P16 | Quaternary | 14°10'19.5" | 10°08'13.1" | 442,0       | 7,6   | 877,7  | 1,4   | 416,8 | 30,1  | 353,8 | 18,3  | 60,4  | 27,9  | 101,2 | 2,6  | 14,2 | 48,0 | -20,2 | -3,5  | -3,5 | 3,5 |
| F39 | Quaternary | 14°16'07.4" | 10°42'13.8" | 437,0       | 6,9   | 879,4  | 1,5   | 438,9 | 29,5  | 207,4 | 42,1  | 63,5  | 40,0  | 51,3  | 5,6  | 11,6 | 60,2 | -23,0 | -3,7  | -3,7 |     |
| F31 | Basement   | 14°12'09.7" | 10°31'17.5" | 436,0       | 7,0   | 655,9  | 1,1   | 327,8 | 30,7  | 244,0 | 17,6  | 71,2  | 19,5  | 79,0  | 8,7  | 7,1  | 45,9 | -19,5 | -3,2  | -3,2 | 1,5 |
| F34 | Quaternary | 14°13'00.6" | 10°22'00.6" | 453,0       | 6,7   | 1015,0 | 1,7   | 508,3 | 30,9  | 244,0 | 25,5  | 92,7  | 45,7  | 66,4  | 2,7  | 17,6 | 54,0 | -22,6 | -3,7  | -3,7 | 3,2 |
| F37 | Quaternary | 14°10'31.8" | 10°12'35.9" | 484,0       | 7,2   | 664,6  | 1,1   | 331,5 | 31,3  | 207,4 | 22,1  | 94,2  | 17,1  | 34,8  | 2,8  | 21,9 | 61,8 | -22,6 | -3,8  | -3,8 | 3,2 |
| F35 | Quaternary | 14°14'11.6" | 10°20'31.3" | 453,0       | 6,7   | 1062,0 | 1,7   | 524,1 | 32,5  | 237,9 | 20,7  | 96,4  | 55,1  | 62,4  | 3,6  | 20,3 | 49,8 | -22,6 | -3,3  | -3,3 |     |
| P1  | Quaternary | 14°17'58.3" | 10°35'49.5" | 404,0       | 6,4   | 998,8  | 1,6   | 499,4 | 26,8  | 256,2 | 71,3  | 100,5 | 43,3  | 89,9  | 11,8 | 11,7 | 80,3 | -16,7 | -3,2  | -3,2 | 3,7 |
| F18 | Quaternary | 14°36'13.3" | 10°31'48.7" | 185,0       | 7,6   | 644,9  | 1,1   | 323,0 | 31,3  | 183,0 | 19,9  | 118,9 | 7,4   | 90,1  | 1,8  | 5,6  | 31,2 | -16,1 | -3,0  | -3,0 |     |

|     |            |             |             |             |       |        |        |        |       |       |       |        |       |       |       |       |       |       |       |      |      |
|-----|------------|-------------|-------------|-------------|-------|--------|--------|--------|-------|-------|-------|--------|-------|-------|-------|-------|-------|-------|-------|------|------|
| F36 | Quaternary | 14°12'55.8" | 10°15'23.2" | 470,0       | 7,1   | 906,8  | 1,5    | 455,1  | 31,3  | 244,0 | 28,1  | 125,8  | 18,2  | 72,4  | 2,1   | 19,8  | 54,3  | -25,5 | -4,2  | -4,2 |      |
| F1  | Quaternary | 14°18'07.7" | 10°35'38.7" | 10°35'38.7" | 406,0 | 1299   | 1299,0 | 2,3    | 660,8 | 29,2  | 201,3 | 101,2  | 273,9 | 45,3  | 89,2  | 0,0   | 24,9  | 839,7 | -21,1 | -3,6 | -6,8 |
| F7  | Basement   | 14°27'28.6" | 10°06'32.3  | 10°06'32.3  | 365,0 | 7,0    | 1208,0 | 2,0    | 596,0 | 29,0  | 152,3 | 89,4   | 287,7 | 42,5  | 61,7  | 0,0   | 30,6  | 785,1 | -23,1 | -3,7 | -3,7 |
| F9  | Basement   | 14°26'36.2" | 10°06'15.4  | 371,0       | 6,9   | 2604,0 | 4,2    | 1290,0 | 30,7  | 280,6 | 235,0 | 597,0  | 36,0  | 137,6 | 11,6  | 49,6  | 257,4 | -25,0 | -3,8  | -3,8 | 2,6  |
| F30 | Basement   | 14°08'26.7" | 10°31'50.8" | 468,0       | 6,2   | 4769,0 | 7,9    | 2386,0 | 31,5  | 353,8 | 552,5 | 1520,5 | 209,5 | 248,5 | 101,5 | 141,5 | 600,5 | -25,9 | -4,0  | -4,0 | 3,2  |

GROUPE C

|     |            |             |             |       |     |       |     |       |      |       |      |      |      |      |     |      |      |       |      |      |     |
|-----|------------|-------------|-------------|-------|-----|-------|-----|-------|------|-------|------|------|------|------|-----|------|------|-------|------|------|-----|
| F17 | Quaternary | 14°32'05.5" | 10°35'55.2" | 366,0 | 7,2 | 683,2 | 1,1 | 341,2 | 32,1 | 237,9 | 2,3  | 11,2 | 9,6  | 61,6 | 1,5 | 8,9  | 24,6 | -24,4 | -4,2 | -4,2 | 1,1 |
| F19 | Quaternary | 14°42'50.2" | 10°27'46.5" | 340,0 | 7,0 | 328,1 | 0,5 | 163,8 | 31,1 | 183,0 | 1,4  | 0,0  | 0,0  | 14,7 | 3,8 | 4,8  | 41,1 | -28,0 | -3,8 | -3,8 | 2,6 |
| F42 | Basement   | 14°13'19.9" | 10°54'35,1" | 415,0 | 7,2 | 533,1 | 0,9 | 271,3 | 32,2 | 280,6 | 3,7  | 16,1 | 4,2  | 42,0 | 1,1 | 7,9  | 56,4 | -28,7 | -4,6 | -4,6 | 0,4 |
| F40 | Basement   | 14°14'54"   | 10°46'03.6" | 435,0 | 7,1 | 413,1 | 0,7 | 210,5 | 30,2 | 176,5 | 3,9  | 10,0 | 3,9  | 37,1 | 1,0 | 6,2  | 26,1 | -28,9 | -4,8 | -4,8 | 0,4 |
| F8  | Basement   | 14°26'52.6" | 10°06'32.2  | 369,0 | 6,6 | 757,5 | 1,2 | 367,5 | 29,0 | 207,4 | 61,5 | 93,5 | 32,4 | 65,7 | 2,6 | 12,2 | 73,4 | -32,0 | -4,6 | -4,6 | 4,5 |
| P2  | Quaternary | 14°57'14.5" | 10°07'34.4" | 336,0 | 6,9 | 400,0 | 0,7 | 205,0 | 30,4 | 183,0 | 2,1  | 3,2  | 0,0  | 15,9 | 0,0 | 6,8  | 42,0 | -32,1 | -4,7 | -4,7 | 2,9 |

GROUPE D

|     |            |           |             |       |     |       |     |       |      |       |      |     |      |      |     |     |      |       |      |      |     |
|-----|------------|-----------|-------------|-------|-----|-------|-----|-------|------|-------|------|-----|------|------|-----|-----|------|-------|------|------|-----|
| F12 | Quaternary | 15°03'22" | 10°12'11.5" | 332,0 | 6,9 | 462,3 | 0,8 | 230,5 | 32,7 | 207,4 | 19,0 | 6,2 | 14,3 | 33,7 | 4,3 | 9,2 | 44,8 | -43,2 | -5,7 | -5,7 | 0,3 |
|-----|------------|-----------|-------------|-------|-----|-------|-----|-------|------|-------|------|-----|------|------|-----|-----|------|-------|------|------|-----|
